# Supplementary material for: Serum interleukin 6 and acute urinary retention in elderly men with benign prostatic hyperplasia in China: a cross-sectional study
Source: PubMed Central journal article supplement — Transl Androl Urol. 2021 Jan;10(1):455–65. doi: 10.21037/tau-20-914 (PMC7844514; doi:10.21037/tau-20-914), 2021-01
Supplement: tau-10-01-455-dss.pdf [file tau-10-01-455-dss.pdf]

## Data Sharing Statement

|                     |                                                                                                                                                     |                                                                                                                  |
|---------------------|-----------------------------------------------------------------------------------------------------------------------------------------------------|------------------------------------------------------------------------------------------------------------------|
| <b>Article Info</b> | http://dx.doi.org/10.21037/tau-20-914                                                                                                               |                                                                                                                  |
| <b>Item</b>         | <b>Question</b>                                                                                                                                     | <b>Authors' Response<br/>(place - if not applicable)</b>                                                         |
| 1                   | Would you like to share data collected for your study to others?                                                                                    | Yes                                                                                                              |
| 2                   | If not, would you like to share the reason for your decision?                                                                                       | -                                                                                                                |
| 3                   | What data in particular will be shared?                                                                                                             | All the published data.                                                                                          |
| 4                   | Any other documents will be shared? Such as study protocol, statistical analysis plan, informed consent form, clinical study report, analytic code. | Available on request.                                                                                            |
| 5                   | When will data availability begin?                                                                                                                  | The date when the article is published.                                                                          |
| 6                   | When will data availability end?                                                                                                                    | Three years after the article was published.                                                                     |
| 7                   | To whom will you share the data?                                                                                                                    | All the academic investigators who are interested in our study.                                                  |
| 8                   | For what type of analysis or purpose?                                                                                                               | To achieve aims in the approval proposal.                                                                        |
| 9                   | How or where can the data/documents be obtained?                                                                                                    | Emails could be sent to the address below to obtain the shared data: wu-di@hotmail.com.                          |
| 10                  | Any other restrictions?                                                                                                                             | We may balance the potential benefits and risks for each request and then provide the data that could be shared. |
